# Supplementary material
Source: PubMed Central journal article supplement (PMC5695102)
Supplement: IAI.00530-17_zii012172226s1.pdf [file IAI.00530-17_zii012172226s1.pdf]

## Supplemental materials

### Requirement and Synergistic Contribution of PAF acetylhydrolase Sse and Streptolysin S to Inhibition of Neutrophil Recruitment and Systemic Infection by Hypervirulent *emm3* Group A *Streptococcus* in Subcutaneous Infection of Mice

Wenchao Feng, Dylan Minor, Mengyao Liu, and Benfang Lei

Department of Microbiology and Immunology, Montana State University, Bozeman, MT 59718

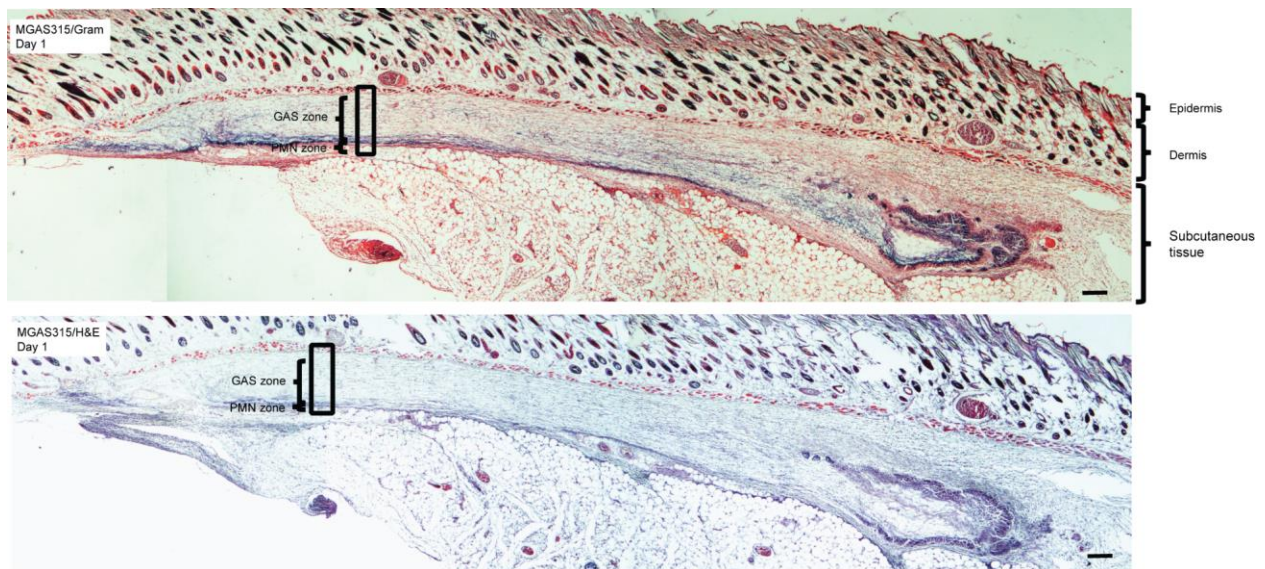

**Figure S1. Histological analyses of MGAS315 skin infection sites in mice.** Five 6-week old female C57BL/6J mice were subcutaneously inoculated with  $1.7 \times 10^8$  cfu MGAS315. Skin infection sites were collected on day 1 after inoculation, fixed, and analyzed with Gram and H&E stains, as described in the Materials and Methods section. Presented are representative Gram and H&E stain images taken at 2X magnification with the bar represents 200  $\mu\text{m}$ . The half curly parentheses indicate the bacterial and neutrophil (PMN) zones. The boxes indicate the areas that are shown in Fig. 4 at higher magnification.

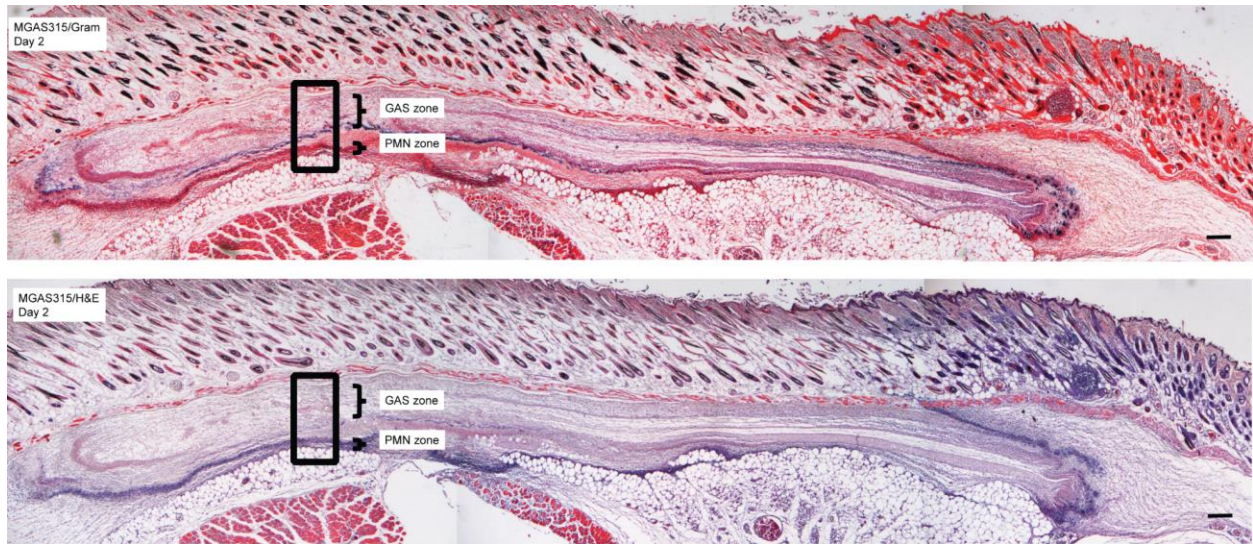

**Figure S2. Histological analyses of MGAS315 skin infection sites in mice.** Five 6-week old female C57BL/6J mice were subcutaneously inoculated with  $1.7 \times 10^8$  cfu MGAS315. Skin infection sites were collected on day 2 after inoculation, fixed, and analyzed with Gram and H&E stains, as described in the Materials and Methods section. Presented are representative Gram and H&E stain images taken at 2X magnification with the bar represents 200  $\mu$ m. The half curly parentheses indicate the bacterial and PMN zones. The boxes indicate the areas that are shown in Fig. 5 at higher magnification.

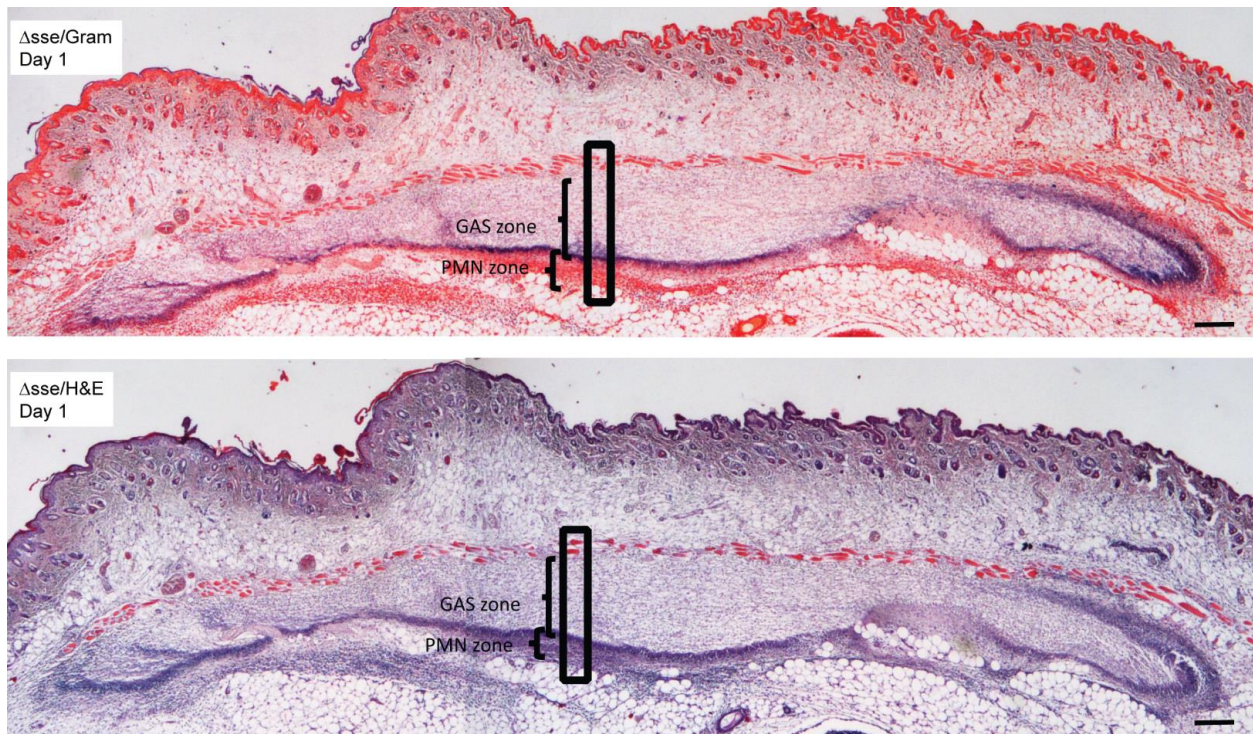

**Figure S3. Histological analyses of MGAS315  $\Delta$ sse skin infection sites in mice.** Five 6-week old female C57BL/6J mice were subcutaneously inoculated with  $2.0 \times 10^8$  cfu  $\Delta$ sse. Skin infection sites were collected on day 1 after inoculation, fixed, and analyzed with Gram and H&E stains, as described in the Materials and Methods section. Presented are representative Gram and H&E stain images taken at 2X magnification with the bar represents 200  $\mu$ m. The half curly parentheses indicate the bacterial and neutrophil (PMN) zones. The boxes indicate the areas that are shown in Fig. 4 at higher magnification.

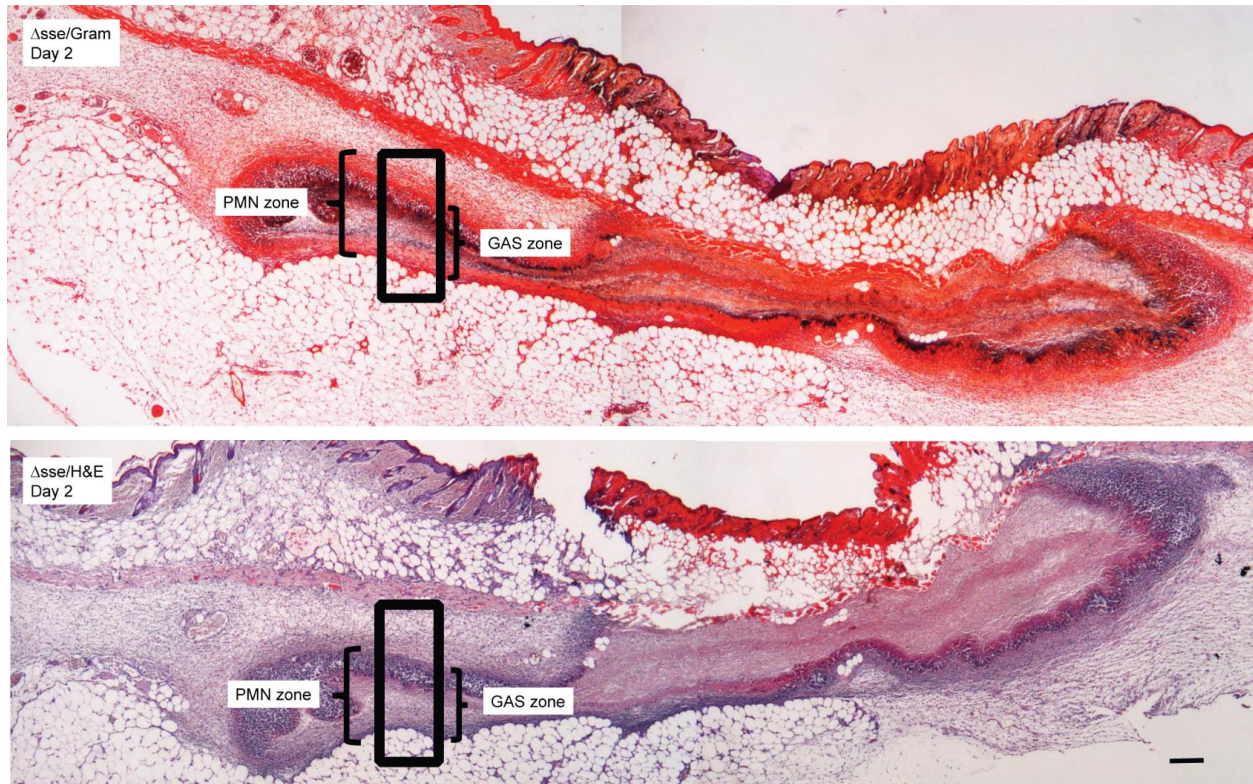

**Figure S4. Histological analyses of MGAS315  $\Delta$ *sse* skin infection sites in mice.** Five 6-week old female C57BL/6J mice were subcutaneously inoculated with  $2.0 \times 10^8$  cfu  $\Delta$ *sse*. Skin infection sites were collected on day 2 after inoculation, fixed, and analyzed with Gram and H&E stains, as described in the Materials and Methods section. Presented are representative Gram and H&E stain images taken at 2X magnification with the bar represents 200  $\mu$ m. The half curly parentheses indicate the bacterial and neutrophil (PMN) zones. The boxes indicate the areas that are shown in Fig. 5 at higher magnification.

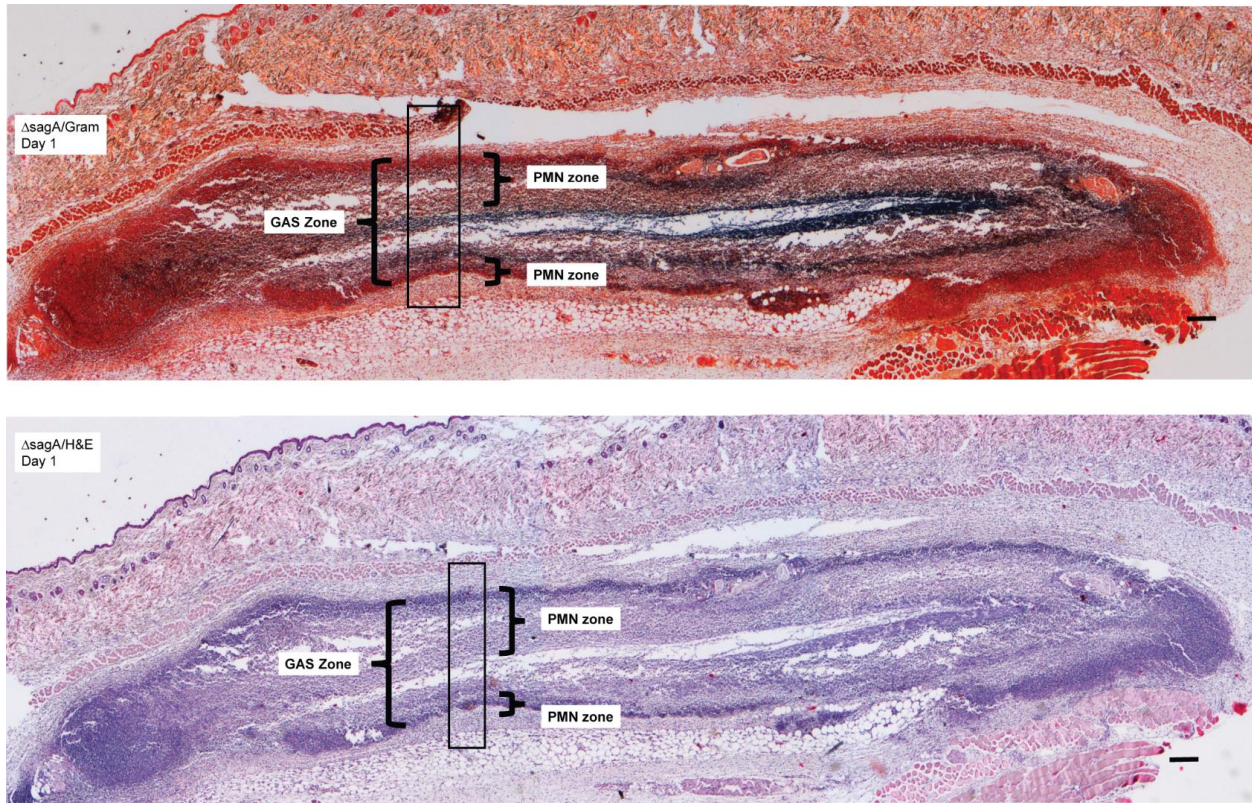

**Figure S5. Histological analyses of MGAS315 *ΔsagA* skin infection sites in mice.** Five 6-week old female C57BL/6J mice were subcutaneously inoculated with  $1.9 \times 10^8$  cfu *ΔsagA*. Skin infection sites were collected on day 1 after inoculation, fixed, and analyzed with Gram and H&E stains, as described in the Materials and Methods section. Presented are representative Gram and H&E stain images taken at 2X magnification with the bar represents 200  $\mu$ m. The half curly parentheses indicate the bacterial and neutrophil (PMN) zones. The boxes indicate the areas that are shown in Fig. 4 at higher magnification.

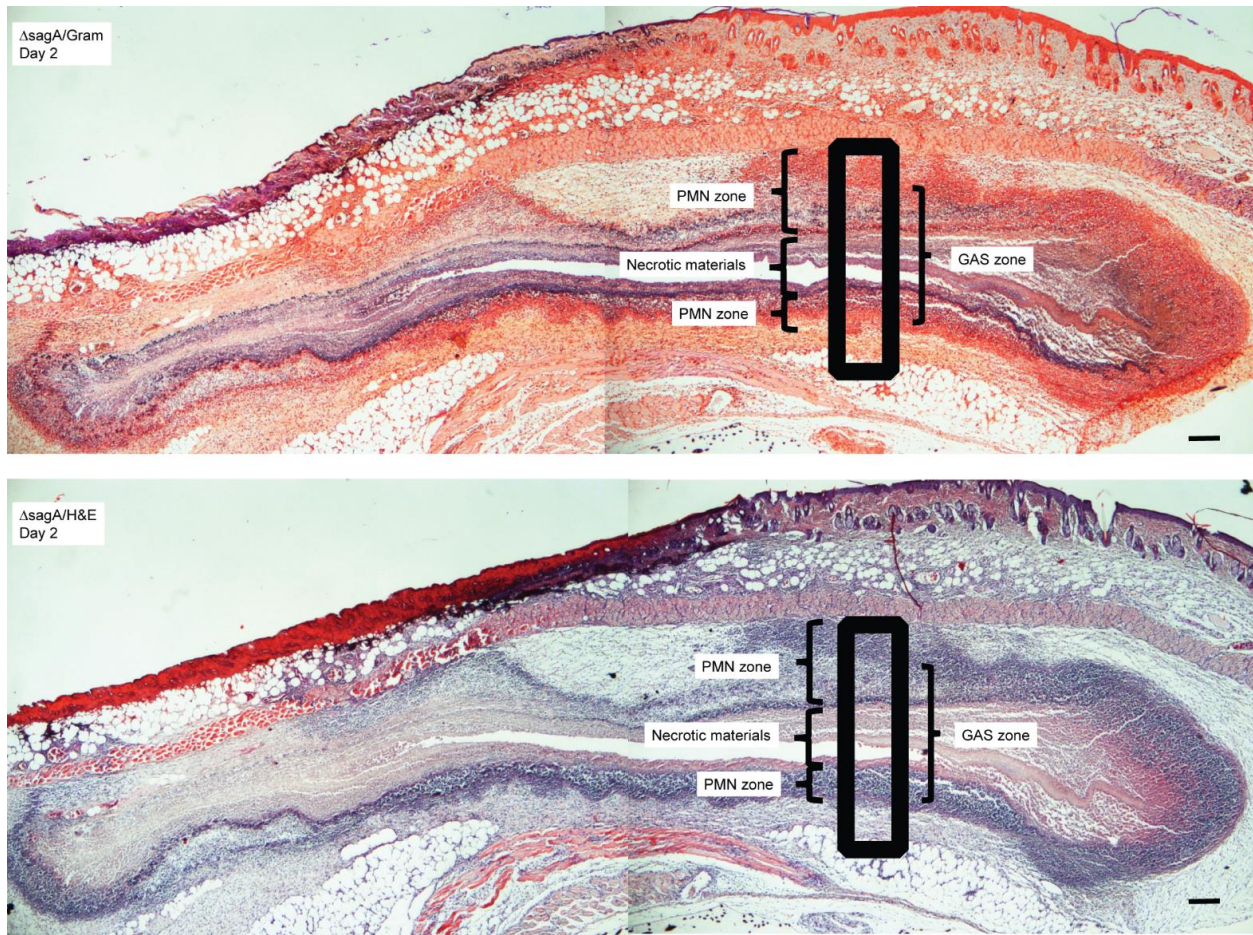

**Figure S6. Histological analyses of MGAS315 *ΔsagA* skin infection sites in mice.** Five 6-week old female C57BL/6J mice were subcutaneously inoculated with  $1.9 \times 10^8$  cfu *ΔsagA*. Skin infection sites were collected on day 2 after inoculation, fixed, and analyzed with Gram and H&E stains, as described in the Materials and Methods section. Presented are representative Gram and H&E stain images taken at 2X magnification with the bar represents 200  $\mu\text{m}$ . The half curly parentheses indicate the bacterial and neutrophil (PMN) zones. The boxes indicate the areas that are shown in Fig. 5 at higher magnification.

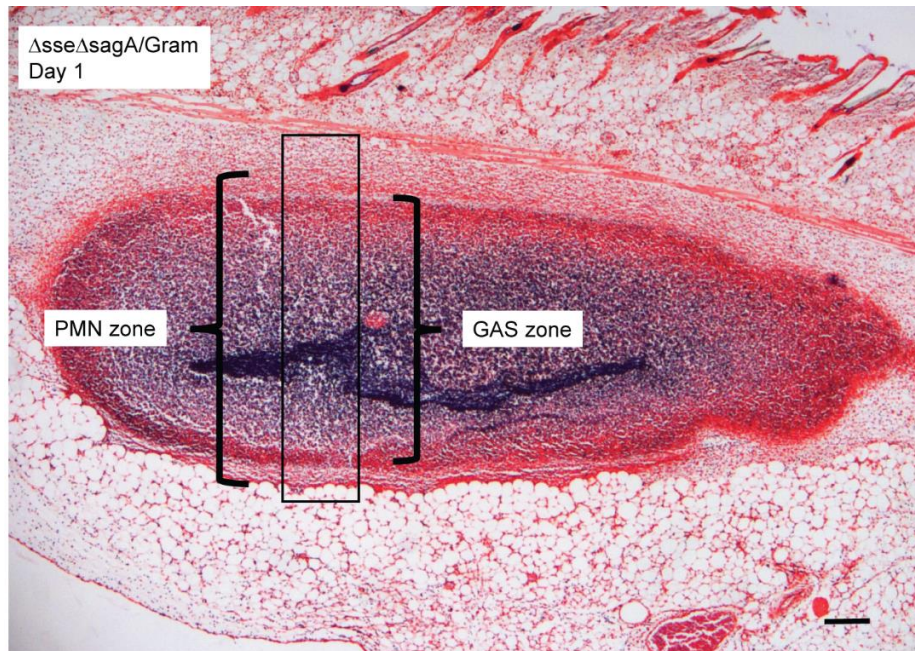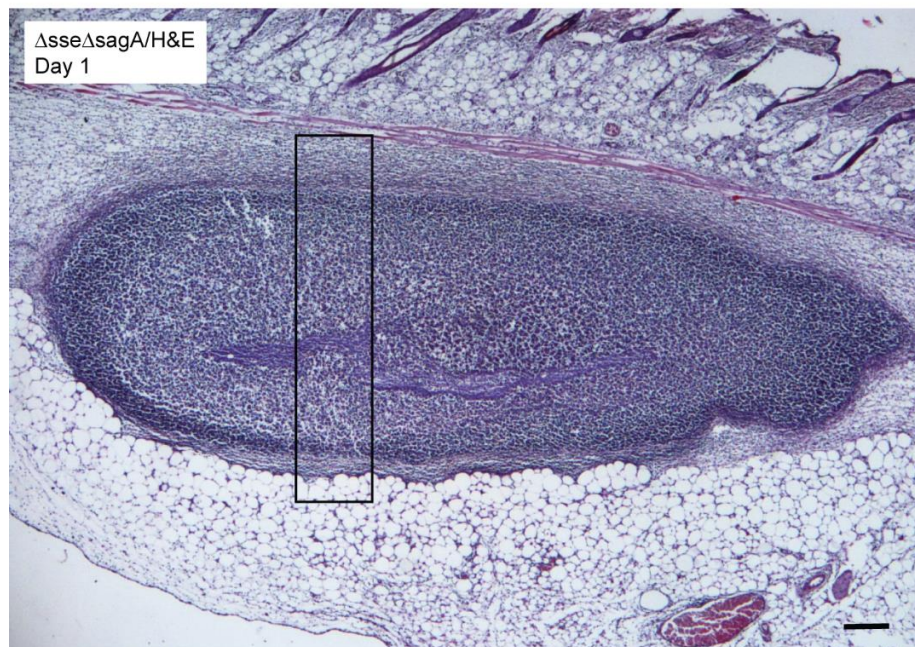

**Figure S7. Histological analyses of MGAS315 *ΔsseΔsagA* skin infection sites in mice.** Five 6-week old female C57BL/6J mice were subcutaneously inoculated with  $2.0 \times 10^8$  cfu *ΔsseΔsagA*. Skin infection sites were collected on day 1 after inoculation, fixed, and analyzed with Gram and H&E stains, as described in the Materials and Methods section. Presented are representative Gram and H&E stain images taken at 2X magnification with the bar represents 200  $\mu\text{m}$ . The half curly parentheses indicate the bacterial and neutrophil (PMN) zones. The boxes indicate the areas that are shown in Fig. 4 at higher magnification.

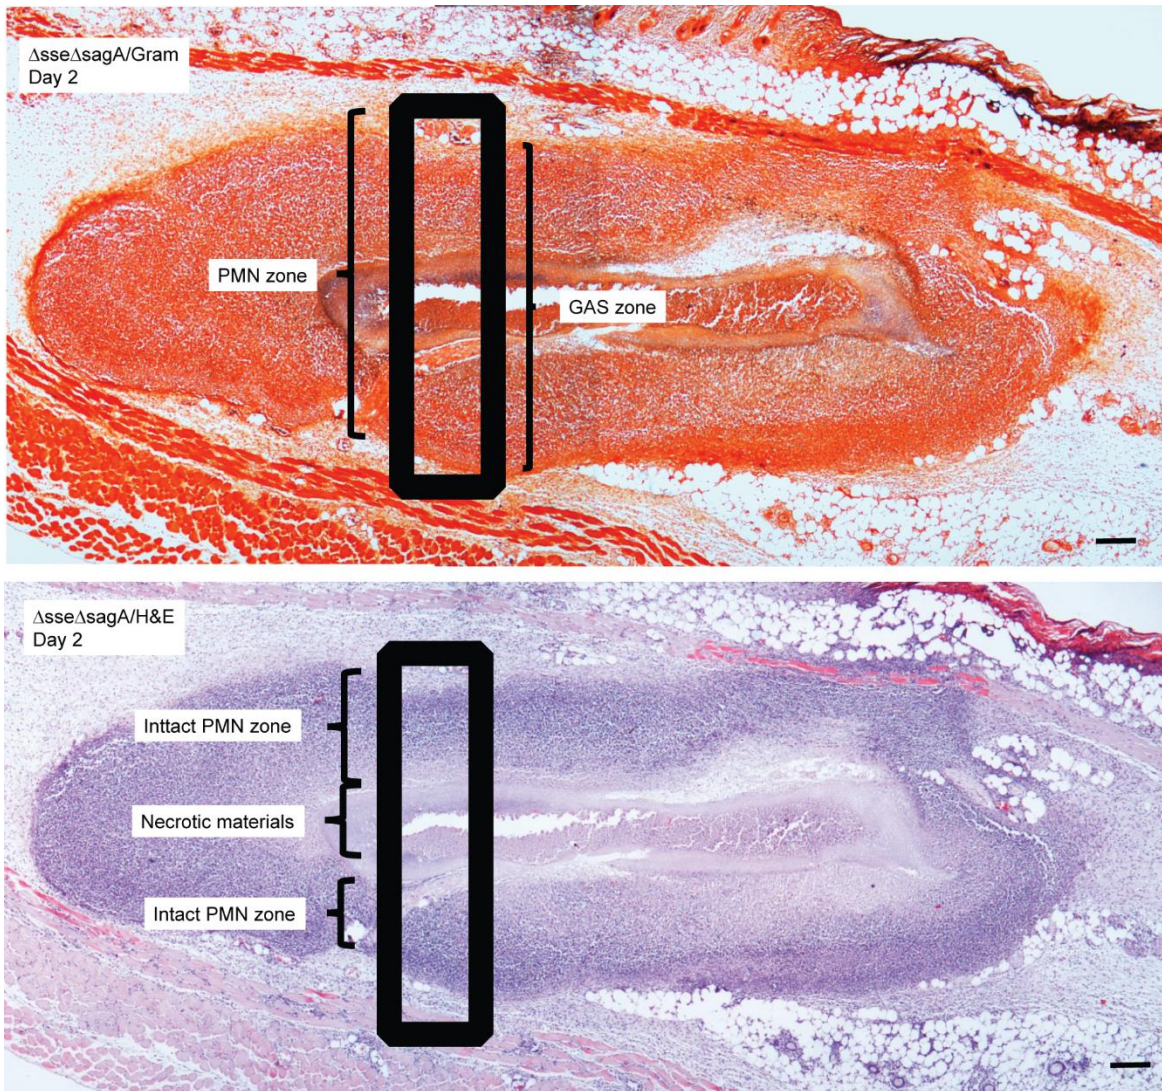

**Figure S8. Histological analyses of MGAS315  $\Delta sse\Delta sagA$  skin infection sites in mice.** Five 6-week old female C57BL/6J mice were subcutaneously inoculated with  $2.0 \times 10^8$  cfu  $\Delta sse\Delta sagA$ . Skin infection sites were collected on day 2 after inoculation, fixed, and analyzed with Gram and H&E stains, as described in the Materials and Methods section. Presented are representative Gram and H&E stain images taken at 2X magnification with the bar represents 200  $\mu\text{m}$ . The half curly parentheses indicate the bacterial and neutrophil (PMN) zones. The boxes indicate the areas that are shown in Fig. 5 at higher magnification.



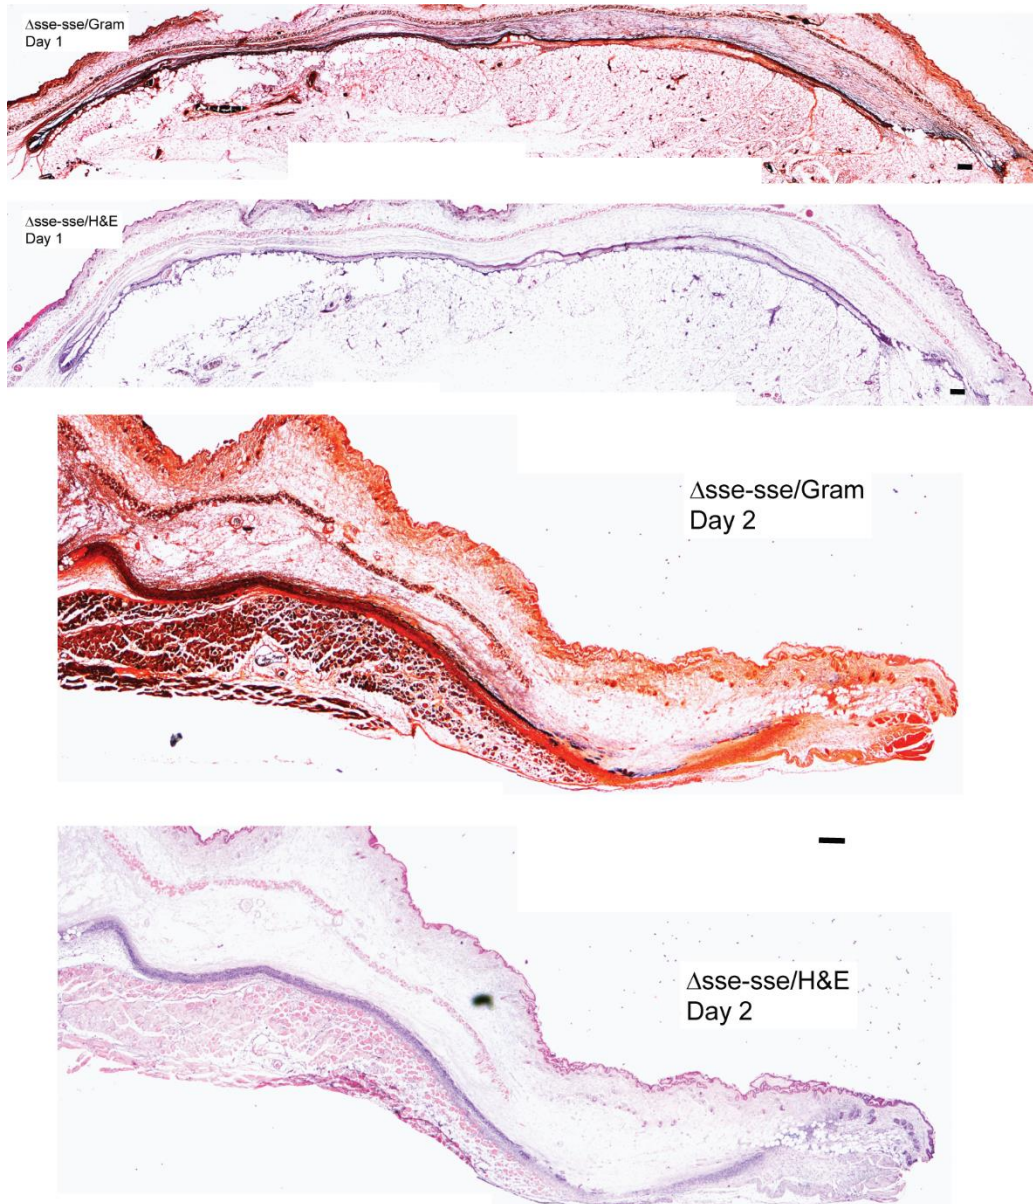

**Figure S9. Histological analyses of  $\Delta sse-sse$  skin infection sites in mice.** Five 6-week old female C57BL/6J mice were subcutaneously inoculated with  $1.8 \times 10^8$  cfu  $\Delta sse-sse$ . Two and three mice were sacrificed on days 1 and 2 after inoculation, respectively, to collect skin infection sites. The skin infection sites were fixed and analyzed with Gram and H&E stains, as described in the Materials and Methods section. Presented are representative Gram and H&E stain images on days 1 and 2 after inoculation. The bar represents 200  $\mu$ m.

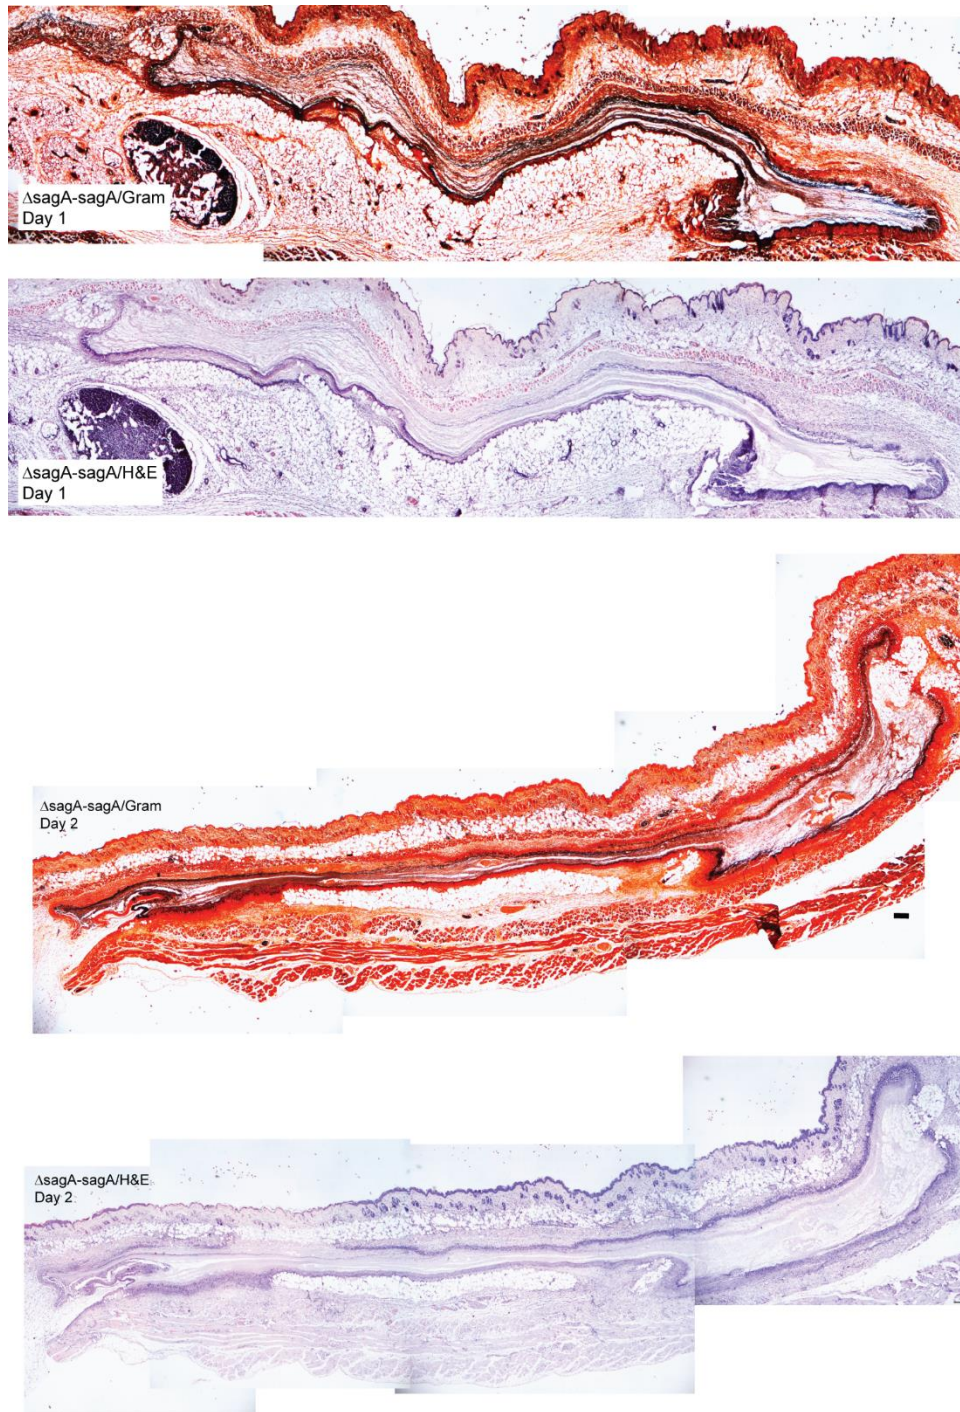

**Figure S10. Histological analyses of  $\Delta sagA-sagA$  skin infection sites in mice.** Five 6-week old female C57BL/6J mice were subcutaneously inoculated with  $1.4 \times 10^8$  cfu  $\Delta sagA-sagA$ . Two and three mice were sacrificed on days 1 and 2 after inoculation, respectively, to collect skin infection sites. The skin infection sites were fixed and analyzed with Gram and H&E stains, as described in the Materials and Methods section. Presented are representative Gram and H&E stain images on days 1 and 2 after inoculation. The bar represents 200  $\mu\text{m}$ .

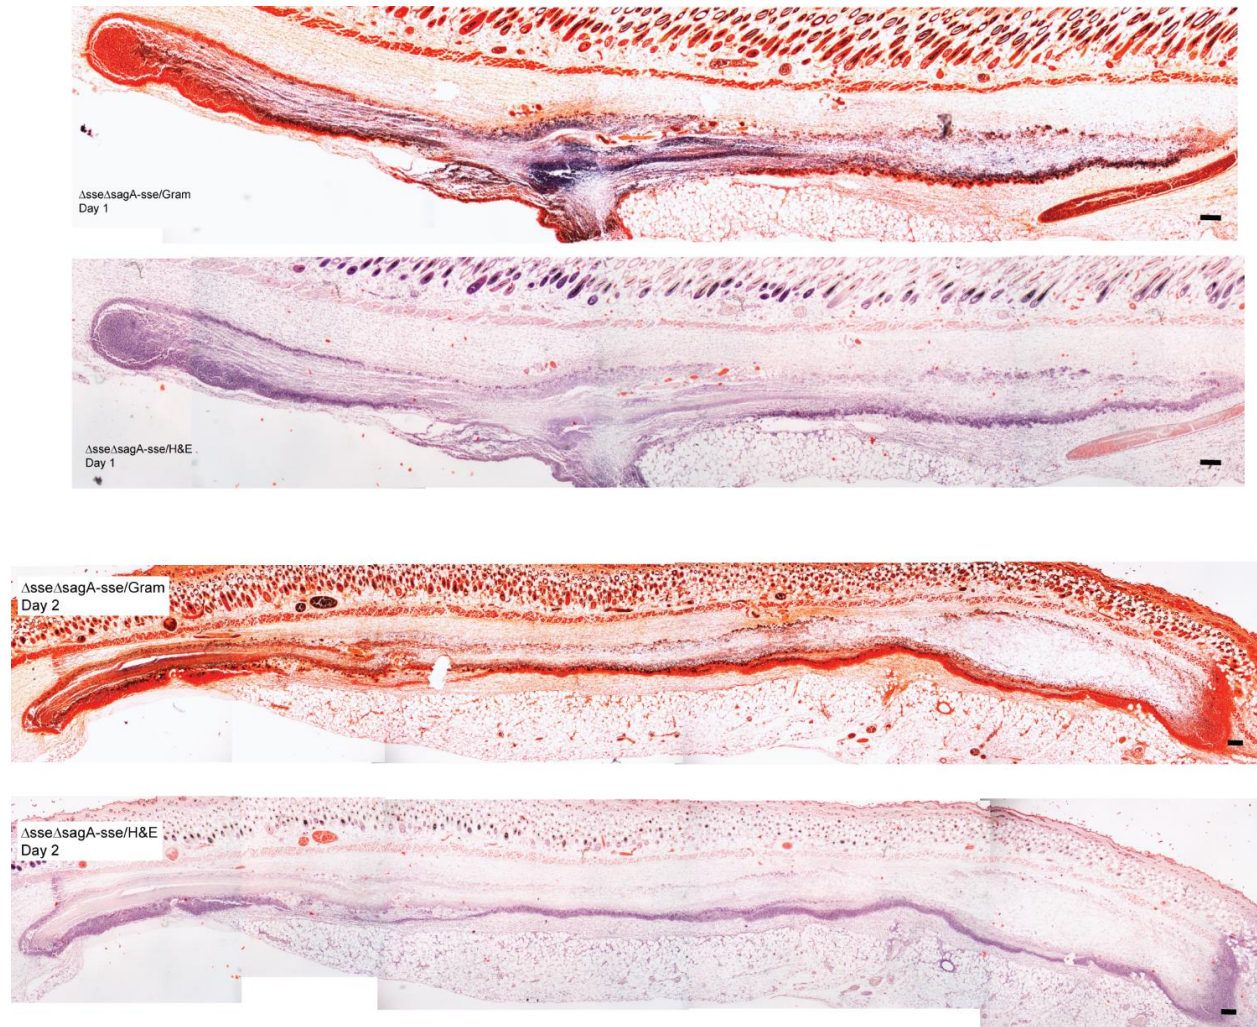

**Figure S11. Histological analyses of  $\Delta sse\Delta sagA-sse$  skin infection sites in mice.** Five 8-week old female C57BL/6J mice were subcutaneously inoculated with  $1.6 \times 10^8$  cfu  $\Delta sse\Delta sagA-sse$ . Two and three mice were sacrificed on days 1 and 2 after inoculation, respectively, to collect skin infection sites. The skin infection sites were fixed and analyzed with Gram and H&E stains, as described in the Materials and Methods section. Presented are representative Gram and H&E stain images on days 1 and 2 after inoculation. The bar represents 200  $\mu$ m.

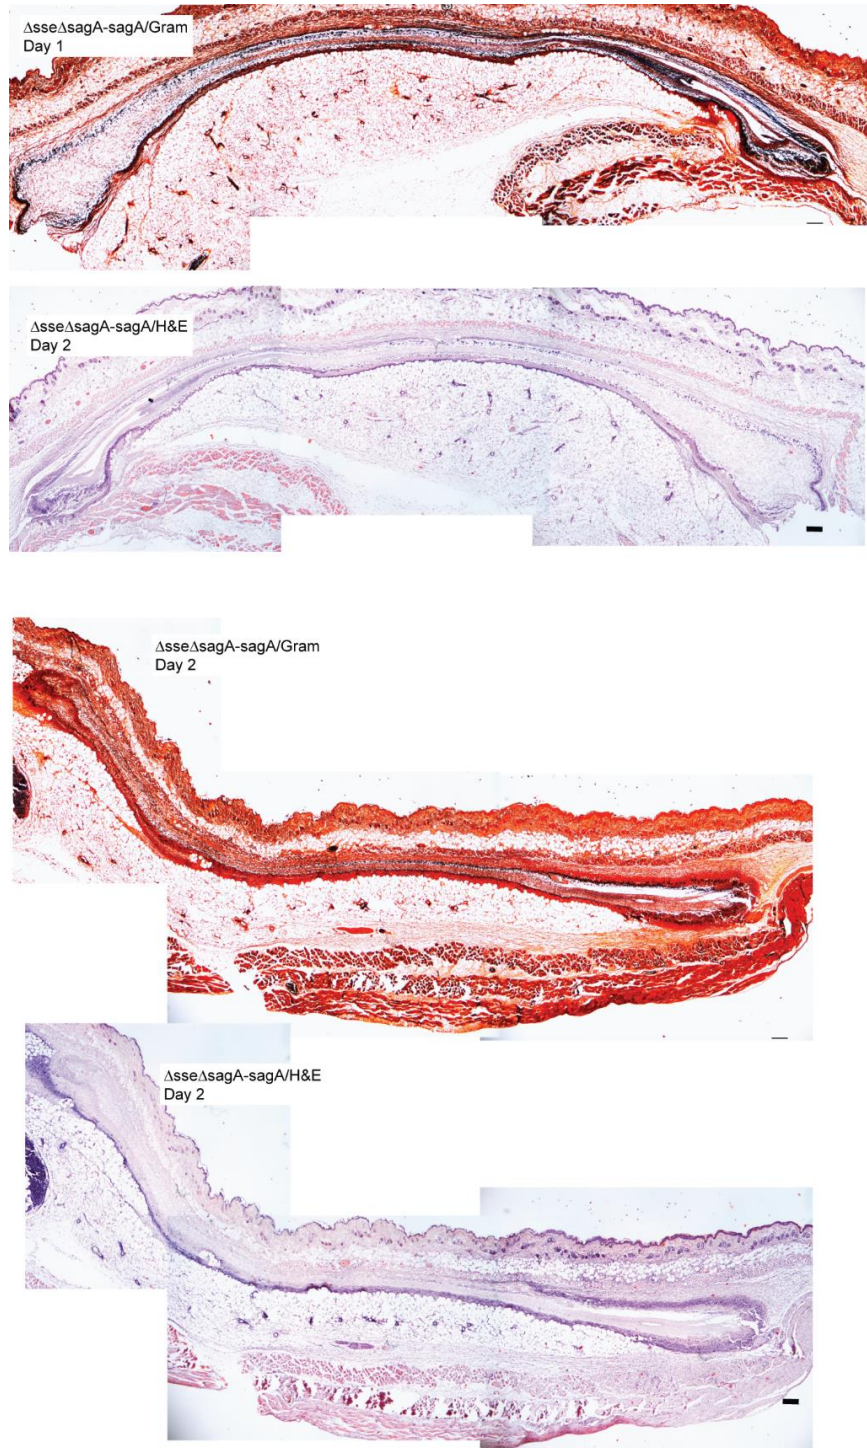

**Figure S12. Histological analyses of  $\Delta sse\Delta sagA-sagA$  skin infection sites in mice.** Five 6-week old female C57BL/6J mice were subcutaneously inoculated with  $1.5 \times 10^8$  cfu  $\Delta sse\Delta sagA-sagA$ . Two and three mice were sacrificed on days 1 and 2 after inoculation, respectively, to collect skin infection sites. The skin infection sites were fixed and analyzed with Gram and H&E stains, as described in the Materials and Methods section. Presented are representative Gram and H&E stain images on days 1 and 2 after inoculation. The bar represents 200  $\mu\text{m}$ .

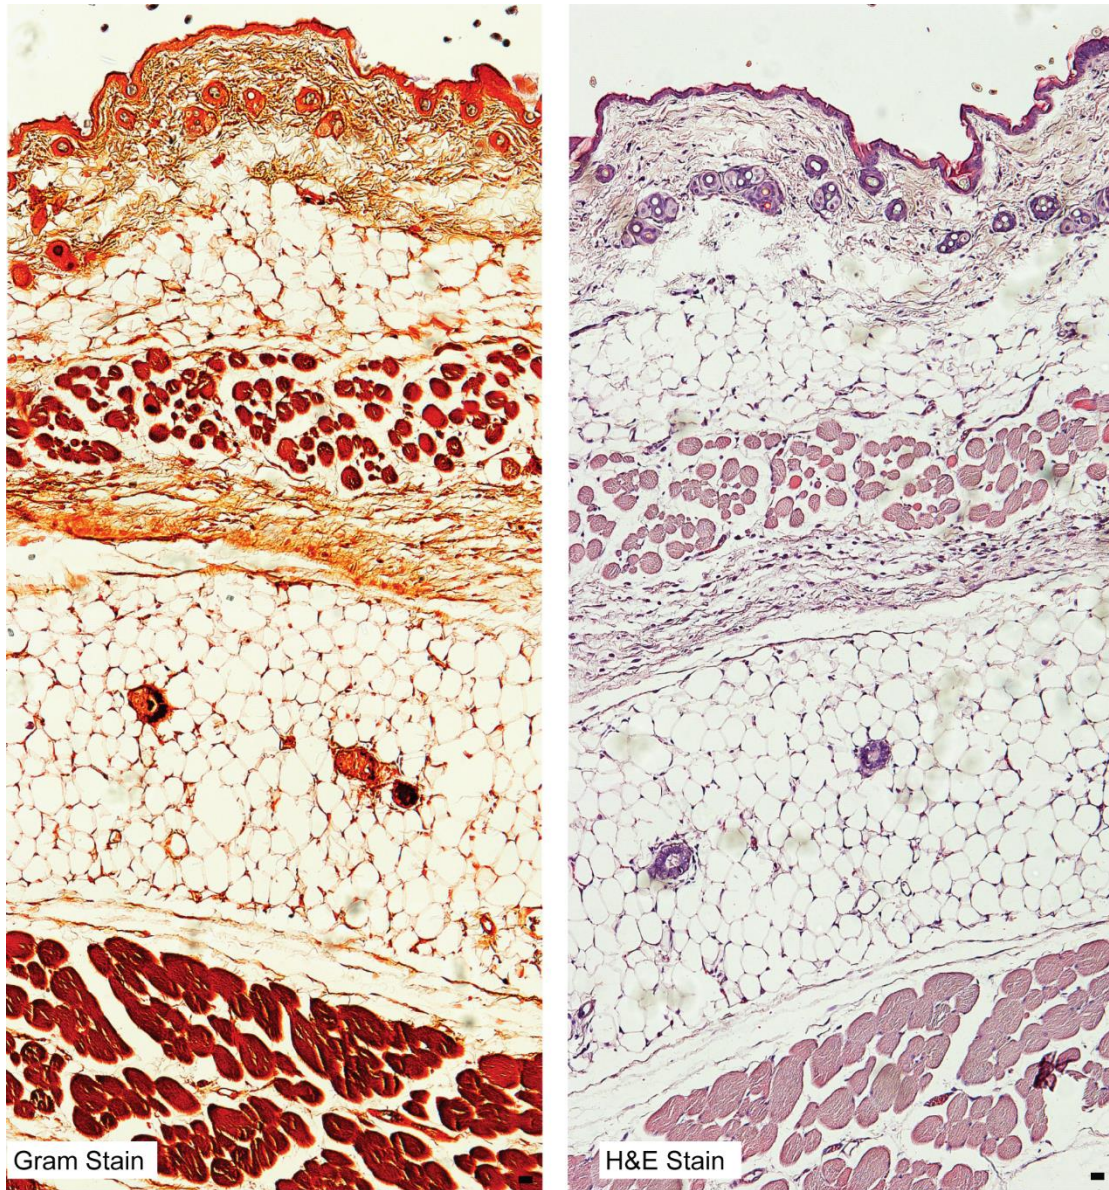

**Figure S13. Gram and H&E stain images of the skin of a C57BL/6J mouse. *eof ΔsseΔsagA* skin infection sites in mice.** The skin infection sites were fixed and analyzed with Gram and H&E stains, as described in the Materials and Methods section. The bar represents 20 µm.
